# Supplementary material for: A molecular design approach towards elastic and multifunctional polymer electronics
Source: PubMed Central journal article supplement (PMC8481247; doi:10.1038/s41467-021-25719-9), 2021-09-29
Supplement: 41467_2021_25719_MOESM2_ESM.pdf [file 41467_2021_25719_MOESM2_ESM.pdf]

## **Description of Additional Supplementary Files**

File Name: Supplementary Movie 1

Description: 180° Peeling test movie showing the existence of interfacial crosslinking between BA rubber and PDMS
